# Supplementary material
Source: PubMed Central journal article supplement (PMC4333611)
Supplement: Supp_Fig1.pdf [file Supp_Fig1.pdf]

## Supplementary Data

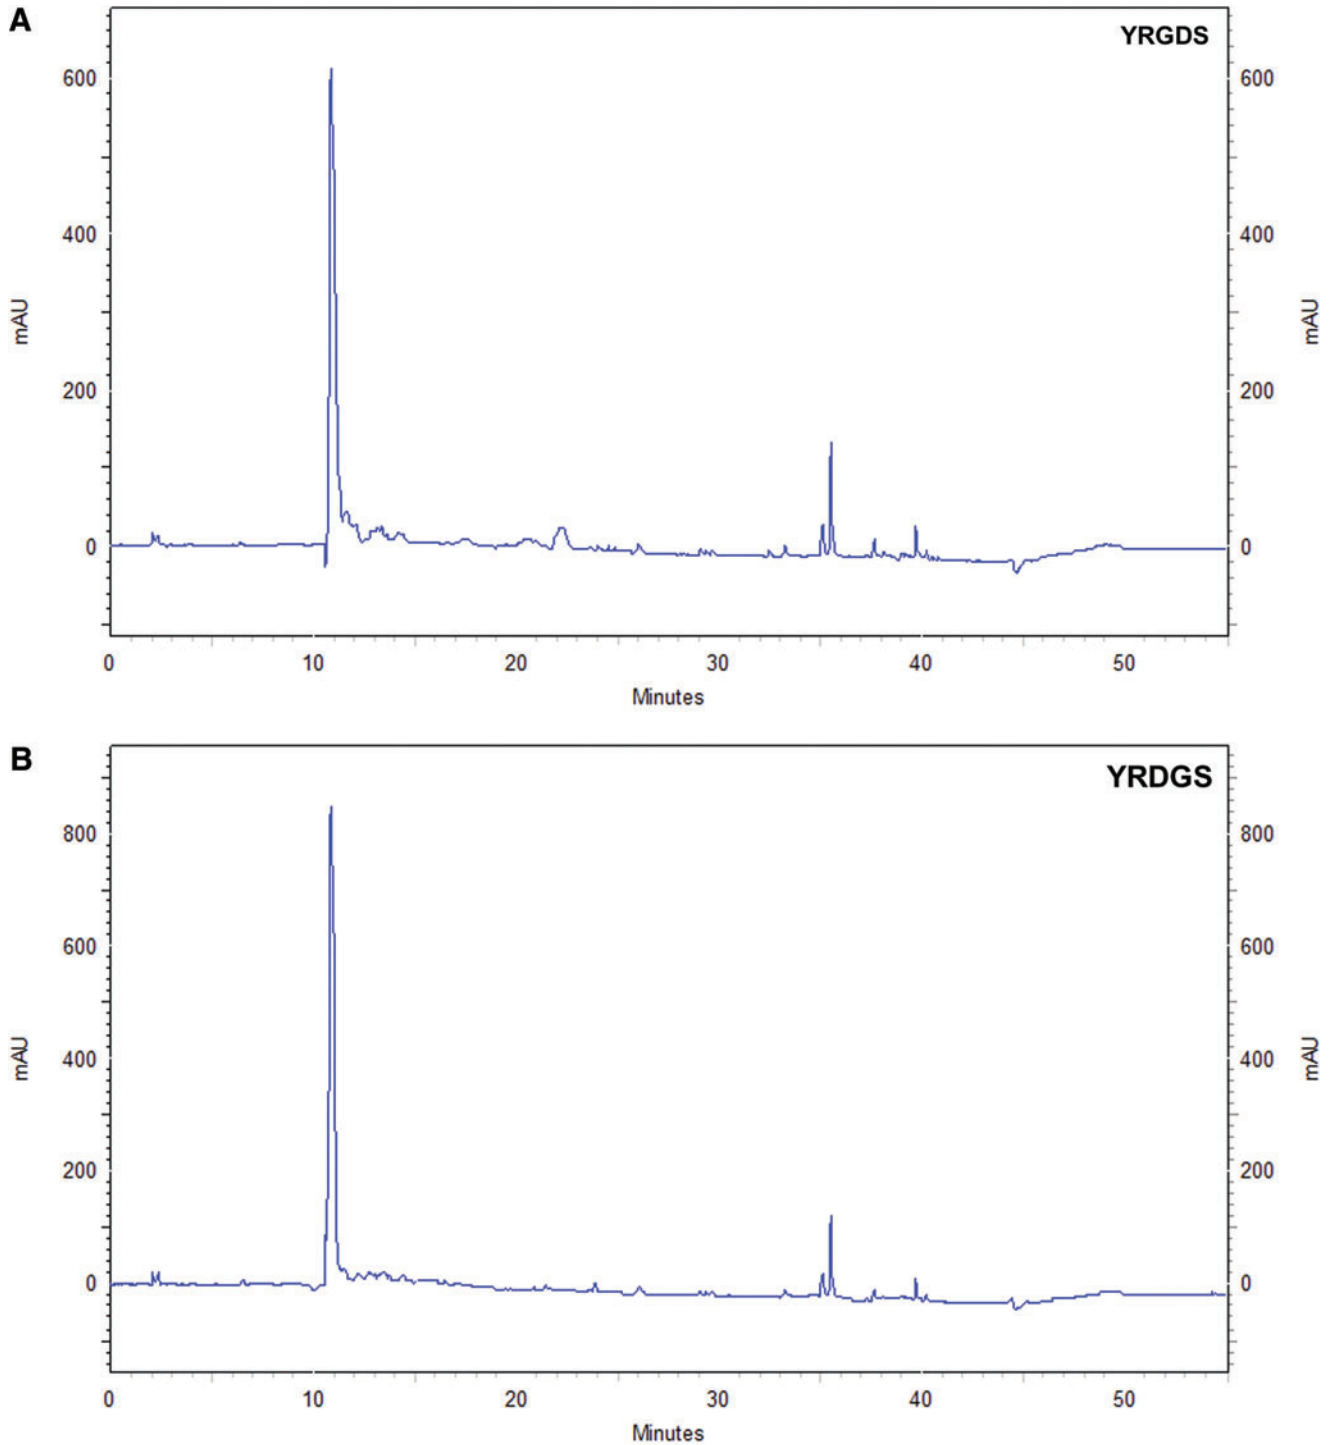

**SUPPLEMENTARY FIG. S1.** (A) High-performance liquid chromatography (HPLC) chromatogram of synthesized YRGDS. Upper channel: UV detection at 230 nm; lower channel: UV detection at 260 nm. YRGDS is observed at the retention time of 10–11 min. (B) HPLC chromatogram of synthesized YRDGS. Upper channel: UV detection at 230 nm; lower channel: UV detection at 260 nm. YRDGS is observed at the retention time of 10–11 min. YRGDS, tyrosine-arginine-glycine-aspartate-serine.
