# Supplementary material
Source: PubMed Central journal article supplement (PMC4333611)
Supplement: Supp_Fig3.pdf [file Supp_Fig3.pdf]

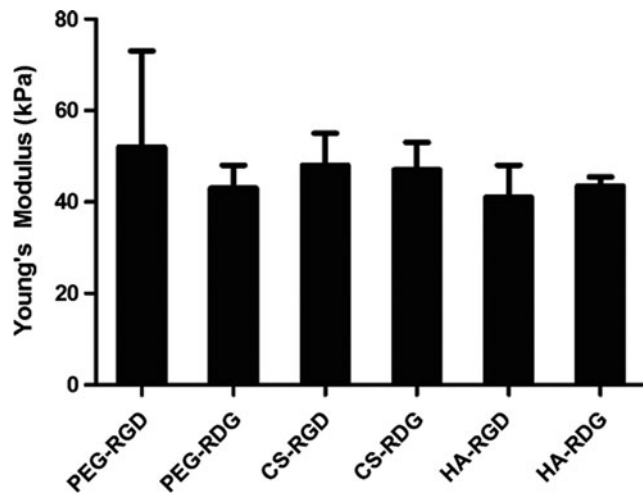

**SUPPLEMENTARY FIG. S3.** Mechanical properties of engineered cartilage with extracellular-matrix-based hydrogels with bovine chondrocytes after 21 days of *in vitro* culture ( $n=3$ ).
