# Supplementary material
Source: PubMed Central journal article supplement (PMC4333611)
Supplement: Supp_Fig4.pdf [file Supp_Fig4.pdf]

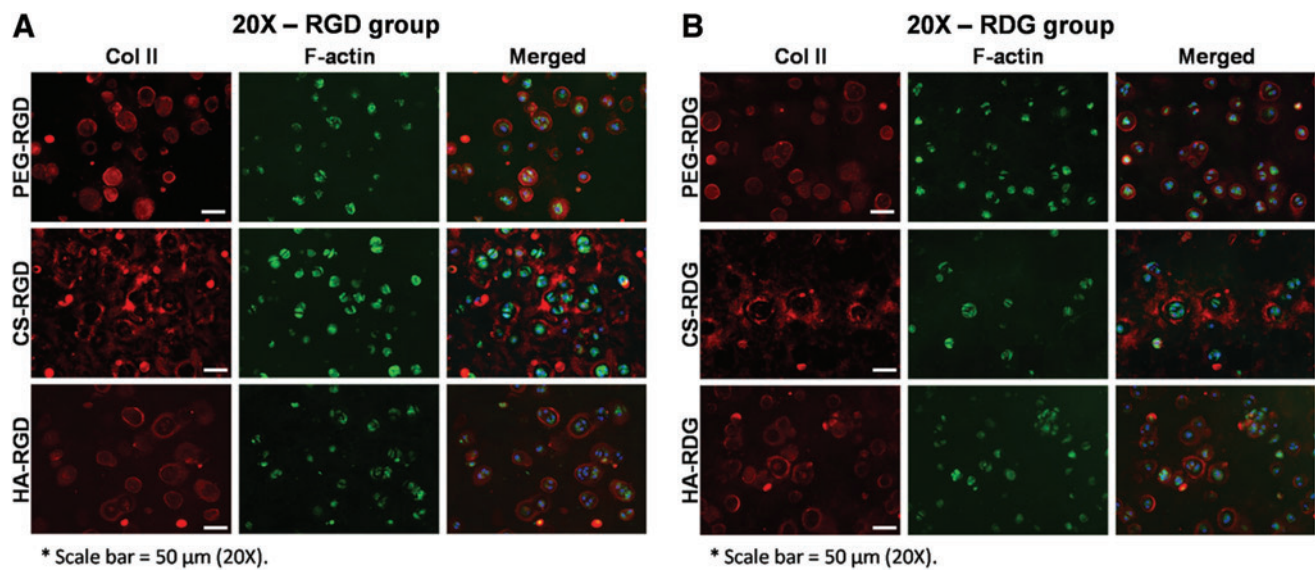

**SUPPLEMENTARY FIG. S4.** Detailed type II collagen and F-actin immunostaining analysis of engineered cartilage. **(A)** RGD-containing polyethylene glycol (PEG), chondroitin sulfate (CS), and hyaluronic acid (HA) hydrogels. **(B)** RDG containing PEG, CS, and HA hydrogels. Scale *bar* = 50  $\mu$ m (20 $\times$ ).
